# Supplementary material for: Measuring Comprehensive, General Health Literacy in the General Adult Population: The Development and Validation of the HLS19-Q12 Instrument in Seventeen Countries
Source: MDPI journal article supplement (doi:10.3390/ijerph192114129), 2022-10-29
Supplement: s1 [file s1]

**Table S3.** Socio-demographic variables included in the regression models.

|                                        | AT          | BE          | BG         | CH          | CZ          | DE          | DK          | FR          | HU          | IE          | IL          | IT          | NO          | PT          | RU          | SI          | SK          |
|----------------------------------------|-------------|-------------|------------|-------------|-------------|-------------|-------------|-------------|-------------|-------------|-------------|-------------|-------------|-------------|-------------|-------------|-------------|
| <b>Gender</b>                          |             |             |            |             |             |             |             |             |             |             |             |             |             |             |             |             |             |
| Male                                   | 1449        | 496         | 411        | 1230        | 780         | 1052        | 1708        | 973         | 559         | 2189        | 631         | 1682        | 1448        | 604         | 2565        | 1675        | 1028        |
| Female                                 | 1518        | 504         | 454        | 1269        | 819         | 1085        | 1894        | 1030        | 636         | 2294        | 684         | 1818        | 1407        | 643         | 3095        | 1685        | 1117        |
| Missing                                | 0           | 0           | 0          | 3           | 0           | 6           | 0           | 0           | 0           | 4           | 0           | 0           | 0           | 0           | 0           | 0           | 0           |
| <b>Age Groups</b>                      |             |             |            |             |             |             |             |             |             |             |             |             |             |             |             |             |             |
| 18-25                                  | 354         | 90          | 99         | 274         | 150         | 216         | 366         | 260         | 131         | 517         | 178         | 329         | 360         | 165         | 553         | 317         | 276         |
| 26-35                                  | 498         | 207         | 115        | 425         | 320         | 324         | 507         | 353         | 228         | 741         | 265         | 453         | 496         | 181         | 1200        | 505         | 376         |
| 36-45                                  | 474         | 142         | 153        | 423         | 263         | 310         | 505         | 379         | 195         | 938         | 266         | 559         | 473         | 255         | 1046        | 606         | 377         |
| 46-55                                  | 584         | 221         | 134        | 464         | 248         | 406         | 655         | 391         | 223         | 804         | 196         | 674         | 491         | 232         | 900         | 598         | 341         |
| 56-65                                  | 448         | 177         | 170        | 382         | 274         | 361         | 611         | 365         | 184         | 651         | 197         | 570         | 411         | 220         | 1029        | 571         | 328         |
| 66-75                                  | 333         | 135         | 142        | 288         | 264         | 256         | 563         | 256         | 154         | 623         | 180         | 460         | 327         | 127         | 567         | 423         | 276         |
| ≥ 76                                   | 271         | 28          | 45         | 243         | 81          | 251         | 394         | 0           | 82          | 213         | 34          | 455         | 213         | 48          | 365         | 340         | 163         |
| Missing                                | 5           | 0           | 7          | 4           | 0           | 19          | 0           | 0           | 0           | 0           | 0           | 0           | 84          | 19          | 0           | 0           | 8           |
| <b>Highest level of education</b>      |             |             |            |             |             |             |             |             |             |             |             |             |             |             |             |             |             |
| Lower<br>secondary<br>or below         | 557         | 30          | 80         | 334         | 711         | 235         | 353         | 72          | 608         | 1224        | 75          | 1510        | 263         | 505         | 366         | 1139        | 394         |
| Higher<br>secondary<br>Above           | 1438        | 117         | 193        | 1175        | 500         | 1012        | 315         | 282         | 307         | 959         | 364         | 1118        | 811         | 380         | 630         | 1260        | 800         |
| secondary                              | 972         | 841         | 586        | 985         | 387         | 853         | 2930        | 1649        | 280         | 2287        | 876         | 872         | 1759        | 362         | 4643        | 961         | 947         |
| Missing                                | 0           | 12          | 6          | 8           | 1           | 42          | 5           | 0           | 0           | 17          | 0           | 0           | 21          | 0           | 21          | 0           | 4           |
| <b>Financial Deprivation</b>           |             |             |            |             |             |             |             |             |             |             |             |             |             |             |             |             |             |
| None                                   | 2130        | 510         | 471        | 1317        | 857         | 1352        | 2872        | 1263        | 490         | 2669        | 569         | 1505        | 2476        | 637         | 2081        | 1415        | 880         |
| Some                                   | 376         | 124         | 172        | 404         | 299         | 228         | 364         | 344         | 241         | 750         | 250         | 525         | 199         | 202         | 963         | 534         | 283         |
| Considerab<br>le                       | 223         | 116         | 79         | 321         | 231         | 140         | 208         | 193         | 150         | 524         | 220         | 720         | 67          | 79          | 849         | 469         | 403         |
| Severe                                 | 115         | 250         | 113        | 414         | 191         | 218         | 131         | 203         | 242         | 498         | 155         | 551         | 42          | 250         | 1427        | 835         | 374         |
| Missing                                | 122         | 0           | 30         | 47          | 20          | 204         | 28          | 0           | 72          | 47          | 122         | 199         | 72          | 79          | 340         | 108         | 205         |
| <b>Self-perceived level in society</b> |             |             |            |             |             |             |             |             |             |             |             |             |             |             |             |             |             |
| 1 lowest                               | 5           | 3           | 18         | 31          | 26          | 10          | 46          | 10          | 18          | 68          | 15          | 54          | 15          | 6           | 73          | 45          | 13          |
| 2                                      | 18          | 17          | 15         | 37          | 31          | 33          | 54          | 44          | 42          | 59          | 24          | 66          | 41          | 16          | 106         | 89          | 29          |
| 3                                      | 73          | 34          | 42         | 94          | 72          | 112         | 161         | 128         | 97          | 142         | 33          | 168         | 73          | 76          | 374         | 275         | 113         |
| 4                                      | 138         | 52          | 60         | 176         | 130         | 245         | 195         | 225         | 169         | 276         | 97          | 310         | 124         | 210         | 718         | 387         | 168         |
| 5                                      | 811         | 117         | 181        | 558         | 528         | 417         | 652         | 508         | 416         | 1283        | 228         | 675         | 579         | 358         | 1411        | 1006        | 531         |
| 6                                      | 504         | 206         | 146        | 455         | 307         | 502         | 687         | 487         | 246         | 912         | 247         | 1050        | 527         | 325         | 991         | 662         | 441         |
| 7                                      | 687         | 322         | 160        | 412         | 304         | 442         | 926         | 391         | 128         | 920         | 316         | 801         | 787         | 178         | 1006        | 551         | 336         |
| 8                                      | 422         | 203         | 90         | 234         | 141         | 271         | 619         | 167         | 43          | 479         | 185         | 246         | 451         | 71          | 518         | 227         | 231         |
| 9                                      | 71          | 41          | 39         | 48          | 19          | 45          | 162         | 30          | 10          | 82          | 47          | 39          | 102         | 5           | 197         | 29          | 61          |
| 10 highest                             | 58          | 5           | 16         | 29          | 31          | 9           | 89          | 12          | 12          | 173         | 54          | 29          | 79          | 2           | 131         | 23          | 45          |
| Missing                                | 181         | 0           | 99         | 429         | 11          | 57          | 11          | 0           | 15          | 94          | 69          | 63          | 77          | 0           | 134         | 66          | 177         |
| <b>Total N</b>                         | <b>2967</b> | <b>1000</b> | <b>865</b> | <b>2502</b> | <b>1599</b> | <b>2143</b> | <b>3602</b> | <b>2003</b> | <b>1195</b> | <b>4487</b> | <b>1315</b> | <b>3500</b> | <b>2855</b> | <b>1247</b> | <b>5660</b> | <b>3360</b> | <b>2145</b> |
